# Supplementary material
Source: publisher figshare collection journal article supplement (https://geolsoc.figshare.com/ndownloader/files/15352994)
Supplement: Supplementary file 1 [file 15352994]

Depth	SiO2	TiO2	Al2O3	Fe2O3	MnO	CaO	K2O	As	Cu	Mo	Rb	V	U	Zn	Zr	TOC
meters below surface	[wt %]	[wt %]	[wt %]	[wt %]	[wt %]	[wt %]	[wt %]	[ppm]	[ppm]	[ppm]	[ppm]	[ppm]	[ppm]	[ppm]	[ppm]	[wt %]
181.42	32.99	0.566	13.83	5.93	0.021	16.19	2.15	11	33	19	121	107	10	115	75	6.108
181.85	31.9	0.556	13.57	5.67	0.021	15.19	2.18	10	29	12	122	106	8	50	79	9.417
182.31	31.3	0.541	13.04	5.42	0.021	17.41	2.09	10	28	12	118	108	6	56	81	7.971
182.75	42.31	0.68	17.54	6.8	0.022	8.25	3.14	11	30	14	175	128	10	91	93	3.511
183.19	43.47	0.715	16.99	6.91	0.021	7.93	3.14	11	24	8	170	125	8	63	108	3.186
183.63	42.94	0.72	17.21	6.99	0.02	8.59	3.16	9	21	3	170	125	9	57	103	2.709
184.13	39.07	0.654	15.85	6.68	0.021	11.39	2.8	12	30	8	152	119	7	73	94	4.606
185.1	62.38	0.93	14.72	3.73	0.005	0.72	2.58	7	20	2	140	106	9	32	259	3.264
185.44	30.41	0.475	12.46	6.62	0.024	20.09	2.16	8	27	20	119	108	9	63	68	3.751
185.9	46.32	0.757	19.55	6.53	0.017	4.52	3.54	11	30	15	193	155	12	106	101	3.113
186.1	38.02	0.633	15.22	5.58	0.016	13.45	2.63	9	28	13	141	130	13	64	88	4.665
186.4	38.43	0.646	16.26	6.66	0.015	10.73	2.74	14	33	11	150	138	10	100	85	5.62
186.76	11.33	0.13	3.61	3.11	0.016	41.7	0.61	6	20	38	33	67	13	85	20	3.946
187	40.92	0.677	17.42	5.91	0.014	10.21	3.03	11	32	12	165	142	11	109	90	3.902
187.82	26.81	0.427	11.17	4.23	0.015	25.75	1.9	8	25	7	102	102	8	69	57	2.942
188.35	18.76	0.319	8.41	4.35	0.02	25.73	1.36	10	31	44	76	87	18	76	43	12.44
188.88	43.83	0.712	18.91	6.5	0.014	6.55	3.55	13	29	10	190	144	9	90	98	3.453
189.63	42.41	0.7	16.97	5.74	0.015	10.01	3.27	10	32	4	173	129	9	73	107	3.066
189.79	39.99	0.621	16.55	5.87	0.016	10.82	3.26	11	38	12	169	120	9	91	86	4.267
189.95	44.43	0.703	14.48	4.94	0.018	12.1	3.09	10	25	< 1.00	153	99	9	43	127	1.937
190.41	18.45	0.31	7.45	7.45	0.054	26.04	1.42	5	11	< 1.00	74	68	3	28	54	1.404
190.89	40.03	0.599	10.51	5.72	0.034	15.88	2.3	7	15	< 1.00	109	96	5	36	143	1.277
191.37	33.83	0.564	13.32	4.24	0.016	19.67	2.66	9	23	1	137	106	5	251	88	3.178
191.85	38.69	0.639	15.14	5.14	0.017	14.44	3.14	9	24	1	159	115	7	57	99	2.83
192.33	36.22	0.576	11.6	4.06	0.018	20.22	2.49	6	19	1	121	96	5	45	115	1.798
192.81	37.97	0.598	14.58	4.98	0.015	15.43	3.04	9	29	< 1.00	156	111	7	136	90	3.269
193.26	45.3	0.741	17.09	5.24	0.016	8.79	3.67	8	23	< 1.00	184	130	7	55	117	2.017
193.71	44.99	0.706	15.66	6.09	0.017	8.45	3.29	11	33	< 1.00	163	125	8	71	121	3.583
194.16	46.43	0.767	16.45	5.34	0.015	8.47	3.38	8	28	< 1.00	166	119	8	52	128	2.39
194.61	38.4	0.641	15.2	5.74	0.018	9.86	2.7	15	51	4	140	112	10	101	93	9.096
195.06	25.41	0.422	9.56	6.62	0.044	22.23	1.93	6	20	< 1.00	96	91	5	32	70	1.345
195.66	22.82	0.383	8.59	6.91	0.05	23.65	1.63	6	16	< 1.00	81	81	4	31	64	1.472
196.1	29.4	0.481	11.01	3.9	0.011	24.61	1.95	10	27	1	100	90	6	55	71
197.42	27.67	0.431	10.82	7.38	0.02	18.36	2.01	21	62	26	97	123	8	101	63	8.665
197.86	37.63	0.581	15.72	7.63	0.015	7.05	2.95	20	73	43	150	159	10	128	79	9.349
199	43.45	0.734	15.09	4.59	0.014	10.53	2.84	10	34	< 1.00	140	123	6	45	123	4.86
199.51	17.54	0.3	7.02	3.3	0.015	13.14	1.21	9	55	62	65	79	16	100	47
200.58	15.43	0.231	5.78	7.64	0.028	25.63	1.14	15	35	99	57	67	6	170	35	10.55
200.82	36.52	0.607	13.79	5.5	0.018	14.9	3	11	28	3	146	120	4	33	95
201.09	23.18	0.341	8.98	4.06	0.015	28.58	1.84	7	28	9	91	90	3	42	52	3.84
201.7	32.42	0.509	12.66	4.77	0.018	18.04	2.57	9	41	12	125	121	6	60	75	5.841
202.31	26.79	0.398	10.28	4.78	0.017	23.23	2.09	11	46	12	101	106	8	129	59	5.51
202.95	28.8	0.424	11.01	4.95	0.017	20.27	2.31	10	48	8	111	104	11	62	59
203.32	38.81	0.617	15.74	6.39	0.021	10.79	3.29	12	39	3	160	125	10	44	83	3.882
203.65	26.67	0.426	10.08	2.98	0.013	27.48	2.09	4	22	< 1.00	107	85	4	37	70	2.17
203.98	39.63	0.644	16.4	6.5	0.019	10.04	3.51	14	34	3	170	133	10	115	87	2.554
204.31	38.07	0.612	15.55	5.39	0.018	13.41	3.19	9	34	< 1.00	155	122	8	47	83	2.848
204.64	28.26	0.431	11.24	3.78	0.013	24.55	2.18	8	34	6	108	103	4	44	67	3.594
204.97	33.78	0.533	14.32	7.07	0.017	13.97	2.82	18	53	25	139	136	10	287	74	4.492
205.5	29.87	0.456	11.42	4.41	0.014	18.48	2.16	10	60	12	108	113	9	48	64	8.9
206	6.45	0.081	2.17	1.77	0.01	45.68	0.39	5	27	34	19	59	6	61	15	6.958
206.5	24.88	0.364	9.66	4	0.012	18.61	1.88	9	67	11	123	98	18	146	42	10
207	36.52	0.57	14.63	5.48	0.014	12.9	3.03	11	50	14	150	121	8	91	80	6.071
207.5	34.37	0.506	13.43	5.14	0.016	14.56	2.87	11	51	29	141	121	7	413	74	7.365
207.83	29.68	0.443	11.39	4.56	0.015	20.83	2.45	10	36	11	120	107	7	44	68	5.647
208.17	32.36	0.542	12.59	4.27	0.018	21	2.72	7	21	2	136	105	3	75	84
208.52	36.34	0.6	14.52	4.31	0.016	16.55	2.99	7	25	1	154	114	6	62	88	3.014
208.92	33.22	0.564	12.27	3.73	0.018	21.28	2.65	4	19	< 1.00	135	92	5	30	87	1.419
209.92	29.12	0.49	10.99	3.42	0.017	24.82	2.34	4	18	< 1.00	121	81	5	41	75	1.892
210.38	33.65	0.554	12.51	3.57	0.013	20.46	2.61	6	27	< 1.00	134	96	6	65	85	2.507
210.82	33.04	0.557	12.62	3.49	0.014	21.1	2.68	4	19	< 1.00	138	99	4	58	88	1.822
211.28	34.26	0.578	13.09	3.65	0.014	18.98	2.77	5	28	< 1.00	138	99	8	57	83	2.023
211.72	34.38	0.527	12.96	3.81	0.011	17.1	2.64	6	42	< 1.00	136	105	10	71	77	5.736
212.16	36.78	0.597	14.24	4.21	0.014	15.85	2.99	7	32	< 1.00	152	107	7	144	86	3.815
212.6	26.57	0.42	9.99	3	0.013	27.22	2.03	5	30	< 1.00	105	87	4	46	68	2.47
213.04	32.13	0.523	12.43	3.48	0.014	21.13	2.66	5	27	< 1.00	133	95	10	44	73	1.703
213.48	33.82	0.549	13.18	3.71	0.014	19.35	2.85	4	30	< 1.00	141	100	8	73	78	1.774
213.92	34.23	0.553	13.48	3.62	0.013	19.37	2.91	5	28	< 1.00	144	110	7	95	81	1.931
214.42	39.04	0.648	13.45	4.01	0.017	15.88	3.02	6	23	< 1.00	147	99	9	47	101	0.9295
214.92	42.53	0.713	15.21	4.45	0.018	12.25	3.38	7	26	< 1.00	168	108	10	55	102	1.157
215.92	38.69	0.637	14.31	3.97	0.015	15.2	3.04	5	34	< 1.00	156	101	10	86	91	1.859
216.42	40.79	0.69	13.68	4.14	0.016	14.67	2.98	6	23	< 1.00	151	107	8	48	111
216.92	33.05	0.525	12.71	3.35	0.014	22.49	2.62	5	24	< 1.00	138	95	8	88	75
217.42	34.2	0.529	12.98	3.56	0.011	19.01	2.58	6	34	3	136	105	7	53	80	1.716
217.92	32.97	0.544	12.21	3.44	0.014	21.21	2.56	5	18	< 1.00	132	99	6	54	84	3.808
218.32	35.86	0.609	13.66	3.54	0.013	18.38	2.81	5	26	< 1.00	145	107	7	41	90	1.689
219.16	34.11	0.583	12.96	3.97	0.015	19.48	2.72	5	24	< 1.00	137	105	6	124	89	1.456
219.58	30.17	0.53	11.75	4.26	0.02	22.43	2.41	5	21	< 1.00	121	95	5	93	78	1.466
220	33.96	0.561	12.94	4.07	0.015	19.65	2.68	5	21	< 1.00	137	108	6	38	88	1.975
220.42	36.94	0.615	13.67	4.55	0.018	17.03	2.86	8	25	1	147	112	4	62	102	2.443
222.92	38.08	0.639	13.86	4.69	0.02	16.37	2.91	7	26	1	150	110	3	47	109	1.964
223.19	36.9	0.626	13.49	4.73	0.021	17.3	2.86	6	30	1	146	105	4	41	103	1.893
223.51	38.78	0.657	13.82	5.03	0.021	15.73	2.94	6	28	< 1.00	150	110	4	44	113	1.542
223.84	40.98	0.698	14.8	5.26	0.022	13.52	3.12	8	26	1	158	111	2	49	116	1.364
224.5	36.63	0.617	14.03	5.09	0.024	16.87	2.94	5	28	< 1.00	149	102	2	40	103	2.013
224.83	38.91	0.657	14.56	5.02	0.023	14.92	3.1	7	27	< 1.00	154	109	3	52	104	1.765
225.16	43.8	0.733	15.45	5.57	0.023	11.18	3.23	10	22	1	163	121	3	48	128	1.138
225.49	40.33	0.673	14.98	6.14	0.026	12.98	3.11	8	24	1	155	111	3	46	118	1.588
225.82	39.35	0.656	15.58	4.73	0.021	14.13	3.09	6	30	3	158	116	4	41	110	1.936
226.15	37.43	0.633	15.43	4.48	0.023	15.51	3.05	7	33	1	152	124	2	100	98	1.947
226.48	40.83	0.673	13.56	5.69	0.021	14.49	2.68	10	23	< 1.00	139	108	4	103	128	1.412
226.81	38.49	0.629	14.73	3.86	0.018	15.7	2.76	5	27	2	146	106	3	42	106	2.941
227.14	35.58	0.594	13.74	4.16	0.02	18.58	2.62	7	23	< 1.00	137	105	4	36	97	0.1677
227.47	40.39	0.657	13.68	4.52	0.02	15.69	2.72	8	23	< 1.00	144	102	5	40	124	1.756
227.8	33.65	0.539	10.78	4.12	0.021	21.99	2.21	6	17	2	112	83	2	33	111	1.162
228.13	30.94	0.517	10.44	4.04	0.023	23.58	2.07	5	18	< 1.00	107	81	3	30	96	1.346
228.58	32.61	0.54	11.05	4.29	0.022	22.1	2.2	6	21	< 1.00	114	87	4	32	100	1.223
229.03	36.22	0.588	11.88	4.35	0.019	19.48	2.39	7	22	< 1.00	123	91	3	108	116	1.263
229.48	37.38	0.612	12.44	4.39	0.02	18.47	2.5	6	22	< 1.00	128	97	4	40	117	1.173
229.93	36.92	0.594	12.23	4.26	0.021	19.14	2.42	5	20	< 1.00	126	94	3	39	115	1.736
230.38	39.98	0.639	13.01	4.64	0.021	16.4	2.57	7	21	2	134	105	3	39	129	1.517
230.83	41.02	0.67	13.36	4.59	0.021	15.38	2.64	6	20	1	136	103	5	36	125	1.633
231.28	39.79	0.665	13.14	4.63	0.022	16.02	2.57	7	22	2	133	98	3	38	129	1.819
232.14	43.13	0.714	16.52	4.71	0.017	9.83	3.07	8	25	2	163	127	3	45	119	4.324
232.62	43.47	0.738	15.65	4.22	0.015	11.92	2.86	7	25	3	149	122	2	49	130	2.898
233.1	50.06	0.806	17.81	4.57	0.01	1.43	3.13	11	47	12	166	147	5	61	135	10.03
233.58	51.45	0.878	19.22	4.31	0.012	4.1	3.5	9	24	3	184	148	5	60	150	3.292
234.06	52.6	0.893	19.18	4.21	0.011	2.8	3.2	9	26	2	168	144	3	90	150	4.924
234.54	48.69	0.854	19.26	4.42	0.013	4.7	3.3	8	35	6	177	154	3	46	135	5.028
235.02	38.38	0.616	15.22	7.37	0.014	8.05	2.55	14	40	59	137	130	4	62	98	10.47
235.5	46.52	0.753	16.62	4.23	0.011	1.08	2.84	10	46	18	151	143	5	72	128	17.04
235.98	51.67	0.885	18.99	4.73	0.01	0.65	3.2	10	30	9	170	158	5	60	147	8.745
237.18	48.64	0.818	17.98	4.6	0.012	4.83	3.16	9	37	6	171	155	4	44	138	25.56
237.77	12.94	0.2	4.15	8.2	0.017	28.12	0.55	18	56	137	29	142	13	190	46	18.85
238.95	24.63	0.411	8.8	4.93	0.045	22.35	1.42	8	29	12	76	84	2	24	80	7.506
239.54	41.88	0.681	14.1	4.78	0.009	8.39	2.34	13	55	28	128	128	5	63	132	12.73
240.13	31.7	0.602	12.65	4.37	0.01	5.49	1.92	13	49	53	109	118	5	90	103	25.22
240.72	49.86	0.809	15.81	5.97	0.01	4.11	2.8	14	31	8	152	136	5	33	162	6.161
241.28	35.67	0.617	13.46	4.6	0.011	10.95	2.36	13	65	29	128	132	4	139	110	13.2
241.87	46.75	0.784	17.08	4.98	0.014	6.87	3.44	10	39	3	181	137	5	57	135	4.023
242.46	54.11	0.873	16.13	4.3	0.012	4.21	3.2	7	34	1	166	121	5	39	190	3.889
243.05	50.92	0.843	16.9	4.57	0.011	4.69	3.01	9	37	3	161	137	4	50	152	5.187
243.64	32.27	0.529	11.94	11.6	0.009	9.51	2.07	35	53	28	110	121	4	377	96	8.796
243.74	21.36	0.399	7.96	2.97	0.005	2.19	1.26	8	42	42	66	94	2	22	78	42.57
243.84	21.5	0.414	8.25	2.87	0.009	9.23	1.31	7	38	30	69	103	3	25	75	33.95
243.94	21.88	0.419	8.27	3.99	0.008	6.21	1.38	12	50	50	72	102	3	102	75	36.32
244.04	32.8	0.583	11.94	4.38	0.012	10.09	2.05	12	46	27	109	143	4	80	113
244.14	19.2	0.359	7.32	3.81	0.012	12.88	1.19	11	51	42	63	100	4	75	72	11.68
244.24	30.08	0.483	9.39	4	0.016	18.46	1.73	10	34	24	90	108	4	72	104	11.07
244.74	41.65	0.666	12.63	3.22	0.01	7.9	2.36	8	37	< 1.00	125	105	3	24	142	3.831
245.24	48.69	0.777	14.71	4.56	0.011	7.45	2.67	9	40	15	138	129	3	167	162	5.584
247.78	39.7	0.683	15.97	5.99	0.012	6.86	2.84	16	69	94	154	176	5	107	120	10.39
248.05	37.89	0.615	14.37	4.9	0.014	10.92	2.69	13	61	51	142	145	6	63	106	9.985
248.33	42.21	0.686	14.54	5.79	0.017	10.53	2.78	11	41	14	147	128	6	64	135	4.851
248.61	54.81	0.886	16.44	4.58	0.011	3.43	3.09	11	39	5	153	131	4	55	178	4.514
248.89	16.94	0.302	7.5	4.41	0.023	25	1.25	10	51	107	65	106	8	52	57	14.39
249.17	49.7	0.811	17.14	5.44	0.013	2.93	3.19	12	52	21	164	161	4	102	146	7.223
249.47	39.53	0.637	15.05	5.19	0.015	11.67	2.89	15	63	11	154	157	6	92	115	5.898
249.96	43.94	0.672	12.64	4.54	0.016	12.96	2.49	9	39	9	129	115	3	53	147	4.329
250.45	41.59	0.687	15.73	5.12	0.013	8.53	2.95	14	65	23	158	162	5	75	118	8.365
250.94	48.08	0.67	10.29	5.19	0.02	11.66	2.06	9	30	9	101	96	4	33	189	3.849
251.43	42.19	0.666	12.48	4.39	0.019	13.7	2.47	7	41	5	128	118	4	41	144	4.45
251.92	46.62	0.741	14.3	4.28	0.012	9	2.76	11	53	9	144	135	5	59	162	5.733
252.5	51.16	0.81	13.34	4.03	0.01	7.54	2.44	10	49	6	126	119	6	64	167	5.661
253.09	46.14	0.762	15.86	5.16	0.01	5.63	2.79	13	77	21	148	157	5	127	151	8.102
253.68	46.53	0.757	12.03	4.01	0.01	10.97	2.14	10	42	10	111	104	4	34	160	6.252
254.27	34.1	0.591	13.4	5.09	0.012	14.26	2.24	15	69	54	122	164	7	97	108	9.7
254.86	43.66	0.749	14.6	4.79	0.009	6.89	2.46	14	57	16	133	152	6	61	142	11.28
255.43	26.76	0.472	10.51	4.52	0.012	18.87	1.69	14	59	74	97	142	7	120	91	12.61
255.7	48.64	0.733	12.39	4.27	0.009	9.63	2.35	9	44	11	120	119	4	38	167
256.16	39.52	0.632	11.79	4.24	0.011	14.1	2.16	10	62	23	115	124	4	105	127	7.964
256.62	37.97	0.654	13.38	5.43	0.01	11.22	2.32	18	58	36	129	160	5	74	123
257.08	37.85	0.609	12.84	5.69	0.012	12.16	2.31	17	74	41	123	147	5	161	120	8.869
257.54	31.65	0.491	10.62	5.28	0.011	12.22	1.91	14	68	33	103	110	8	266	106	11.18
258	54.66	0.852	14.97	3.95	0.009	4.99	2.87	9	36	3	152	122	3	44	187	4.379
258.5	47.22	0.761	15.66	4.7	0.01	6.6	2.74	12	53	9	150	146	6	73	155	7.034
258.9	46.95	0.724	16.58	4	0.014	9.17	2.74	8	35	8	149	118	5	55	156	5.425
259.55	44.25	0.643	12.29	3.8	0.01	12.89	2.26	10	48	20	120	113	3	94	138
259.05	43.43	0.637	12.16	3.38	0.01	14.37	2.3	8	43	11	124	107	4	58	142
260.05	48.68	0.722	14.48	4.27	0.01	7.14	2.68	10	40	8	142	120	2	61	139	7.007
